# Supplementary material for: Synthesis of ion conducting LixAlySizO thin films by atomic layer deposition
Source: Royal Society of Chemistry journal article supplement (doi:10.1039/c3ta14928e), 2014-01-01
Supplement: c3ta14928e1.pdf [file c3ta14928e1.pdf]

## Supporting Information

### Synthesis of ion conducting $\text{Li}_x\text{Al}_y\text{Si}_z\text{O}$ thin films by atomic layer deposition

Ya-Chuan Perng\* and Jea Cho\*

Department of Chemical and Biomolecular Engineering, University of California Los Angeles, CA 90095, USA

Steven Y. Sun

Stanford Synchrotron Radiation Lightsource, Stanford Linear Accelerator Center, Menlo Park, California 94025, USA

Daniel Membreno, Nicolas Cirigliano and Bruce Dunn

Department of Materials Science and Engineering, University of California Los Angeles, CA 90095, USA

Jane P. Chang

Department of Chemical and Biomolecular Engineering, University of California Los Angeles, CA 90095, USA

\* The authors contributed equally to this work

Corresponding author: Prof. Jane P. Chang  
Department of Chemical and Biomolecular Engineering  
University of California, Los Angeles  
5531 Boelter Hall  
Los Angeles, CA, 90095 USA  
E-mail: [jpchang@ucla.edu](mailto:jpchang@ucla.edu)

## Figure S1

Experimental arrangements for electrochemical measurements: (a) cyclic voltammetry (CV) of a ferrocene solution was used to establish whether pinholes were present in the deposited LASO film. The working electrode (W) is LASO-coated ITO; (b) experimental arrangement for impedance measurements.

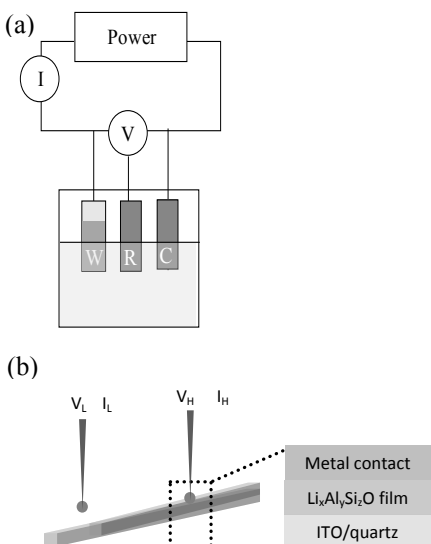

**Figure S2**

Synchrotron X-ray diffraction pattern of as-deposited LASO film (10 nm thick) grown on Si(100) substrate using the 10(Al-O)-6(Li-O)-4(Si-O) sequence. The as-deposited  $\text{Li}_x\text{Al}_y\text{Si}_z\text{O}$  sample did not show any diffraction peak when aligned to the substrate peak of Si(004) at  $q=4.62 \text{ \AA}^{-1}$  (JCPDS no. 00-001-0787) ( $q$  is defined as  $2\pi/d$  where  $d$  is the interplanar spacing in  $\text{\AA}$ ). Experiments were performed at beamline 7-2 of the Stanford Synchrotron Radiation Lightsource (SSRL).

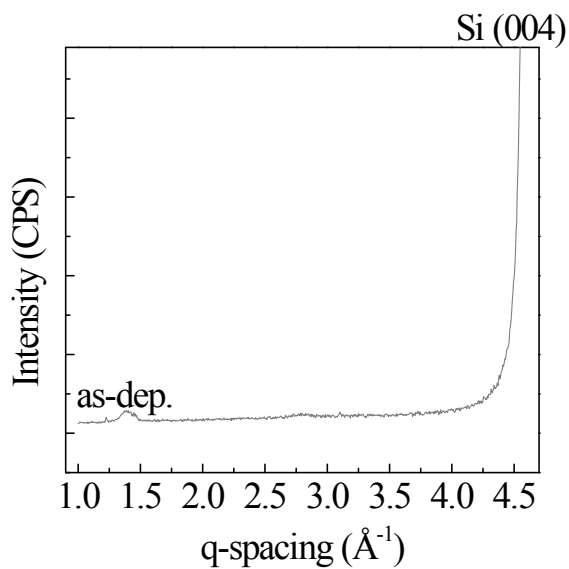

### Figure S3

High Resolution Transmission Electron Microscopy (HRTEM) image of a  $\text{Li}_x\text{Al}_y\text{Si}_z\text{O}$  thin film deposited on 45nm Au/SiO<sub>2</sub> core-shell nanoparticle. This image provides for better contrast to ascertain the film thickness. As-deposited  $\text{Li}_x\text{Al}_y\text{Si}_z\text{O}$  thin films were found to have a conformal coating of 8-14nm (grey) on the Au/SiO<sub>2</sub> nanoparticle (black). FEI Tecnai HRTEM with acceleration voltage of 300 kV was used to take the image.

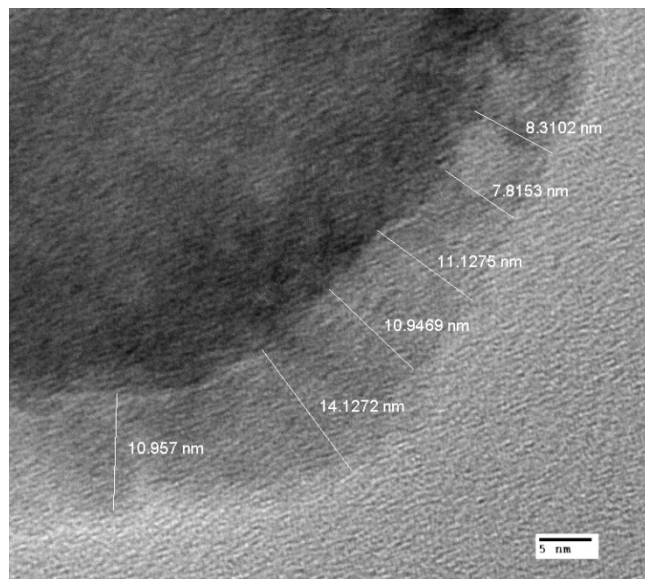

**Table S1**List of experimental conditions used for the deposition of  $\text{Li}_x\text{Al}_y\text{Si}_z\text{O}$ .

| Materials                      | Metal-organic precursors | Housing temp. (°C) | Gasline temp. (°C) | Pulse times (s): |      |       |      |
|--------------------------------|--------------------------|--------------------|--------------------|------------------|------|-------|------|
|                                |                          |                    |                    | Precursor        | Pump | Water | Pump |
| LiOH                           | LTB                      | 160                | 160                | 10               | 50   | 10    | 50   |
| Al <sub>2</sub> O <sub>3</sub> | TMA                      | RT                 | 60                 | 5                | 45   | 5     | 45   |
| SiO <sub>2</sub>               | TEOS                     | RT                 | 60                 | 10               | 50   | 10    | 50   |
